# Supplementary material for: Circulating miR-451a Expression May Predict Recurrence in Atrial Fibrillation Patients after Catheter Pulmonary Vein Ablation
Source: MDPI journal article supplement (doi:10.3390/cells12040638), 2023-02-16
Supplement: s1 [file s1]

**Supplemental Table S1.** List of microRNAs and miRBase accession number

| miRBase Accession #       | miRNA ID                      |
|---------------------------|-------------------------------|
| MIMAT0000062              | hsa-let-7a-5p                 |
| MIMAT0000063              | hsa-let-7b-5p                 |
| MIMAT0000064              | hsa-let-7c-5p                 |
| MIMAT0000065              | hsa-let-7d-5p                 |
| MIMAT0000066              | hsa-let-7e-5p                 |
| MIMAT0000067              | hsa-let-7f-5p                 |
| MIMAT0000416              | hsa-miR-1-3p                  |
| MIMAT0000098              | hsa-miR-100-5p                |
| MIMAT0000101              | hsa-miR-103a-3p               |
| MIMAT0000104              | hsa-miR-107                   |
| MIMAT0000254              | hsa-miR-10b-5p                |
| MIMAT0000421              | hsa-miR-122-5p                |
| MIMAT0000422              | hsa-miR-124-3p                |
| MIMAT0000443              | hsa-miR-125a-5p               |
| MIMAT0000423              | hsa-miR-125b-5p               |
| MIMAT0000445              | hsa-miR-126-3p                |
| MIMAT0000425              | hsa-miR-130a-3p               |
| MIMAT0000427              | hsa-miR-133a-3p               |
| MIMAT0000770              | hsa-miR-133b                  |
| MIMAT0000431              | hsa-miR-140-5p                |
| MIMAT0000434              | hsa-miR-142-3p                |
| MIMAT0000435              | hsa-miR-143-3p                |
| MIMAT0000436              | hsa-miR-144-3p                |
| MIMAT0000437              | hsa-miR-145-5p                |
| MIMAT0000449              | hsa-miR-146a-5p               |
| MIMAT0000450              | hsa-miR-149-5p                |
| MIMAT0000451              | hsa-miR-150-5p                |
| MIMAT0000646              | hsa-miR-155-5p                |
| MIMAT0000417              | hsa-miR-15b-5p                |
| MIMAT0000069              | hsa-miR-16-5p                 |
| MIMAT0000103 MIMAT0000070 | hsa-miR-106a-5p hsa-miR-17-5p |
| MIMAT0000256              | hsa-miR-181a-5p               |
| MIMAT0000257              | hsa-miR-181b-5p               |
| MIMAT0000259              | hsa-miR-182-5p                |
| MIMAT0000261              | hsa-miR-183-5p                |
| MIMAT0000455              | hsa-miR-185-5p                |

|                           |                                 |
|---------------------------|---------------------------------|
| MIMAT0001412              | hsa-miR-18b-5p                  |
| MIMAT0000461              | hsa-miR-195-5p                  |
| MIMAT0000231              | hsa-miR-199a-5p                 |
| MIMAT0000462              | hsa-miR-206                     |
| MIMAT0000241              | hsa-miR-208a-3p                 |
| MIMAT0004960              | hsa-miR-208b-3p                 |
| MIMAT0000076              | hsa-miR-21-5p                   |
| MIMAT0000267              | hsa-miR-210-3p                  |
| MIMAT0000271              | hsa-miR-214-3p                  |
| MIMAT0000077              | hsa-miR-22-3p                   |
| MIMAT0000278              | hsa-miR-221-3p                  |
| MIMAT0000279              | hsa-miR-222-3p                  |
| MIMAT0000280              | hsa-miR-223-3p                  |
| MIMAT0000281              | hsa-miR-224-5p                  |
| MIMAT0000078              | hsa-miR-23a-3p                  |
| MIMAT0000418              | hsa-miR-23b-3p                  |
| MIMAT0000080              | hsa-miR-24-3p                   |
| MIMAT0000081              | hsa-miR-25-3p                   |
| MIMAT0000082              | hsa-miR-26a-5p                  |
| MIMAT0000083              | hsa-miR-26b-5p                  |
| MIMAT0000084              | hsa-miR-27a-3p                  |
| MIMAT0000419              | hsa-miR-27b-3p                  |
| MIMAT0000086              | hsa-miR-29a-3p                  |
| MIMAT0000100              | hsa-miR-29b-3p                  |
| MIMAT0000681              | hsa-miR-29c-3p                  |
| MIMAT0000684              | hsa-miR-302a-3p                 |
| MIMAT0000715              | hsa-miR-302b-3p                 |
| MIMAT0000087              | hsa-miR-30a-5p                  |
| MIMAT0000244              | hsa-miR-30c-5p                  |
| MIMAT0000245              | hsa-miR-30d-5p                  |
| MIMAT0000692              | hsa-miR-30e-5p                  |
| MIMAT0000089              | hsa-miR-31-5p                   |
| MIMAT0000510              | hsa-miR-320a                    |
| MIMAT0000752              | hsa-miR-328-3p                  |
| MIMAT0000753              | hsa-miR-342-3p                  |
| MIMAT0000710 MIMAT0022834 | hsa-miR-365a-3p hsa-miR-365b-3p |
| MIMAT0000732              | hsa-miR-378a-3p                 |
| MIMAT0001340              | hsa-miR-423-3p                  |
| MIMAT0001341              | hsa-miR-424-5p                  |

|              |                 |
|--------------|-----------------|
| MIMAT0001631 | hsa-miR-451a    |
| MIMAT0002177 | hsa-miR-486-5p  |
| MIMAT0002816 | hsa-miR-494-3p  |
| MIMAT0002870 | hsa-miR-499a-5p |
| MIMAT0000252 | hsa-miR-7-5p    |
| MIMAT0000092 | hsa-miR-92a-3p  |
| MIMAT0000093 | hsa-miR-93-5p   |
| MIMAT0000096 | hsa-miR-98-5p   |
| MIMAT0000097 | hsa-miR-99a-5p  |
| MIMAT0000010 | cel-miR-39-3p   |
| MIMAT0000010 | cel-miR-39-3p   |
| N/A          | SNORD61         |
| N/A          | SNORD68         |
| N/A          | SNORD72         |
| N/A          | SNORD95         |
| N/A          | SNORD96A        |
| N/A          | RNU6-6P         |
| N/A          | miRTC           |
| N/A          | miRTC           |
| N/A          | PPC             |
| N/A          | PPC             |

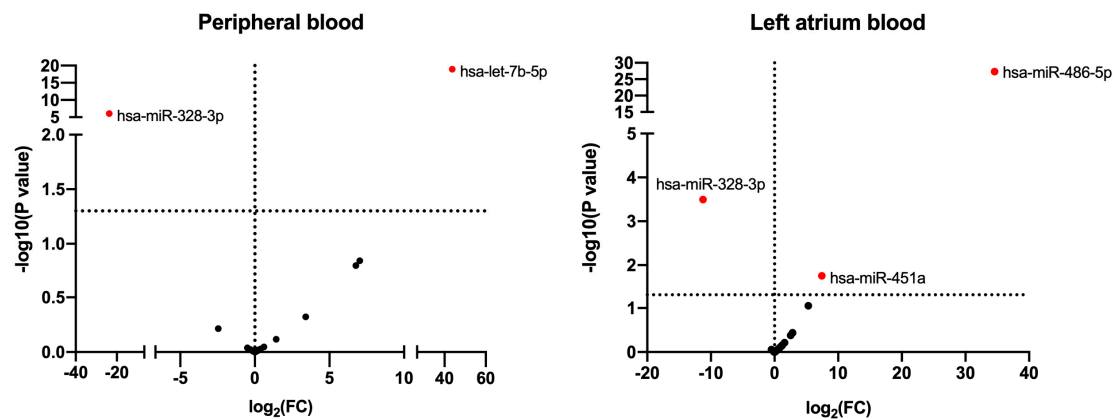

**Figure S1.** Volcano plots of miRNAs AF patients in plasma from peripheral blood and left atrium blood.

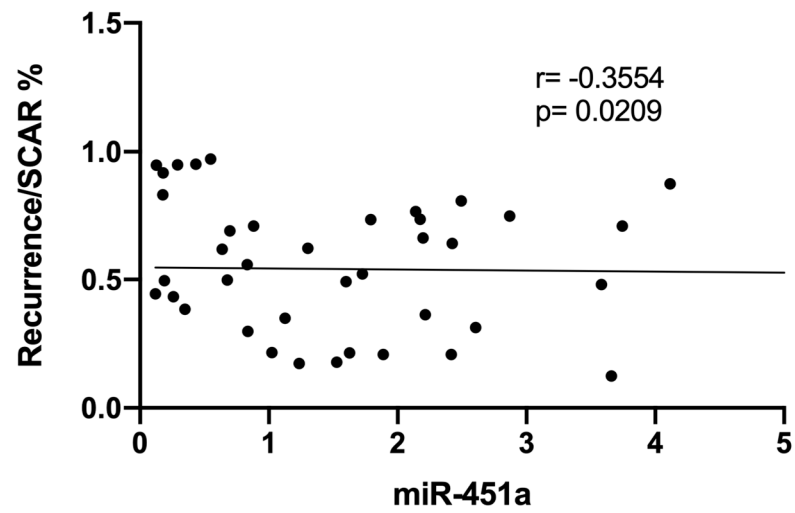

**Figure S2.** Correlation of miR-451a expression and recurrence/scar size.
